# Supplementary material for: Electronic Patient-Reported Outcome Measures in Radiation Oncology: Initial Experience After Workflow Implementation
Source: PubMed Central journal article supplement (PMC6685133; doi:10.2196/12345), 2019-07-24
Supplement: mhealth_v7i7e12345_app4.pdf [file mhealth_v7i7e12345_app4.pdf]

| Item                                  | Days after start of treatment |    |    |     |     |     |     |     |     |
|---------------------------------------|-------------------------------|----|----|-----|-----|-----|-----|-----|-----|
|                                       | -d6                           | d3 | d9 | d20 | d27 | d32 | d38 | d45 | d78 |
| Lack of appetite - severity           | 2                             | 2  | 0  | 0   | 0   | 1   | 0   | 0   | 0   |
| Lack of appetite - ADL impairment     | 0                             | 0  |    |     |     | 0   |     |     |     |
| Dysuria - Severity                    | 0                             | 0  | 0  | 0   | 0   | 0   | 0   | 0   | 0   |
| Urine Urge -Frequency                 | 0                             | 0  | 0  | 0   | 0   | 0   | 0   | 0   | 0   |
| Urine urge - ADL impairment           |                               |    |    |     |     |     |     |     |     |
| Urinary frequency                     | 0                             | 1  | 1  | 0   | 0   | 0   | 0   | 0   | 0   |
| Urinary frequency - ADL impairment    |                               | 0  | 0  |     |     |     |     |     |     |
| Urinary incontinance - frequency      | 0                             | 0  | 0  | 0   | 0   | 0   | 0   | 0   | 0   |
| Urinary incontinance - ADL impairment |                               |    |    |     |     |     |     |     |     |
| Nausea - Frequency                    | 0                             | 1  | 0  | 0   | 0   | 1   | 1   | 0   | 0   |
| Nausea - Severity                     |                               | 2  |    |     |     | 1   | 1   |     |     |
| Vomiting - frequency                  | 0                             | 1  | 0  | 0   | 0   | 0   | 0   | 0   | 0   |
| Vomiting - severity                   |                               | 4  |    |     |     |     |     |     |     |
| Constipation - severity               | 0                             | 0  | 0  | 0   | 1   | 0   | 0   | 1   | 0   |
| Diarrhea frequency                    | 3                             | 1  | 2  | 1   | 0   | 0   | 0   | 0   | 0   |
| Abdominal pain - frequency            | 1                             | 1  | 0  | 0   | 0   | 0   | 0   | 0   | 0   |
| Abdominal pain - severity             | 1                             | 2  |    |     |     |     |     |     |     |
| Abdominal pain - ADL impairment       | 0                             | 1  |    |     |     |     |     |     |     |
| Fecal Incontinence - frequency        | 1                             | 0  | 0  | 1   | 0   | 0   | 0   | 0   | 0   |
| Fecal Incontinence - ADL impairment   | 1                             |    |    | 0   |     |     |     |     |     |
| Sleeping problems - severity          | 3                             | 1  | 2  | 1   | 2   | 1   | 1   | 0   | 1   |
| Sleeping problems - ADL impairment    | 2                             | 0  | 0  | 0   | 0   | 0   | 0   |     | 0   |
| Fatigue - severity                    | 2                             | 1  | 0  | 1   | 1   | 1   | 1   | 1   | 1   |
| Fatigue - ADL impairment              | 2                             | 1  |    | 1   | 0   | 0   | 0   | 0   | 1   |
