# Supplementary material for: Electronic Patient-Reported Outcome Measures in Radiation Oncology: Initial Experience After Workflow Implementation
Source: PubMed Central journal article supplement (PMC6685133; doi:10.2196/12345), 2019-07-24
Supplement: mhealth_v7i7e12345_app5.pdf [file mhealth_v7i7e12345_app5.pdf]

| Item                                  | Days after start of treatment |    |    |     |     |     |
|---------------------------------------|-------------------------------|----|----|-----|-----|-----|
|                                       | -d7                           | d3 | d9 | d14 | d23 | d30 |
| Lack of appetite - severity           | 0                             | 0  | 0  | 0   | 0   | 0   |
| Lack of appetite - ADL impairment     |                               |    |    |     |     |     |
| Dysuria - Severity                    | 0                             | 0  | 0  | 0   | 0   | 0   |
| Urine Urge -Frequency                 | 0                             | 1  | 1  | 1   | 0   | 0   |
| Urine urge - ADL impairment           |                               | 0  | 0  | 0   |     |     |
| Urinary frequency                     | 0                             | 2  | 2  | 1   | 1   | 0   |
| Urinary frequency - ADL impairment    |                               | 1  | 0  | 0   | 0   |     |
| Urinary incontinance - frequency      | 0                             | 0  | 0  | 0   | 0   | 0   |
| Urinary incontinance - ADL impairment |                               |    |    |     |     |     |
| Nausea - Frequency                    | 1                             | 1  | 2  | 1   | 1   | 1   |
| Nausea - Severity                     | 1                             | 1  | 2  | 1   | 1   | 1   |
| Vomiting - frequency                  | 0                             | 0  | 0  | 0   | 0   | 0   |
| Vomiting - severity                   |                               |    |    |     |     |     |
| Obstipation - severity                | 0                             | 1  | 1  | 2   | 1   | 2   |
| Diarrhea frequency                    | 0                             | 0  | 0  | 0   | 0   | 0   |
| Abdominal pain - frequency            | 0                             | 1  | 2  | 1   | 0   | 0   |
| Abdominal pain - severity             |                               | 1  | 2  | 1   |     |     |
| Abdominal pain - ADL impairment       |                               | 1  | 2  | 1   |     |     |
| Fecal Incontinence - frequency        | 0                             | 0  | 0  | 0   | 0   | 0   |
| Fecal Incontinence - ADL impairment   |                               |    |    |     |     |     |
| Sleeping problems - severity          | 2                             | 1  | 2  | 2   | 1   | 3   |
| Sleeping problems - ADL impairment    | 1                             | 0  | 1  | 1   | 2   | 3   |
| Fatigue - severity                    | 1                             | 1  | 2  | 2   | 3   | 3   |
| Fatigue - ADL impairment              | 1                             | 1  | 2  | 2   | 3   | 3   |
